# Supplementary material for: Optimization of High-Throughput Multiplexed Phenotyping of Extracellular Vesicles Performed in 96-Well Microtiter Plates
Source: MDPI journal article supplement (doi:10.3390/polym13142368), 2021-07-19
Supplement: s1 [file s1]

## Supplemental material S1

Materials tested in pilot studies. Data/ result not shown.

### MTP plates

|                                                  |                                                   |
|--------------------------------------------------|---------------------------------------------------|
| sciPLEX plate Type 1 (clear bottom)              | Scienion AG (DE) # CPH-5511-10                    |
| 3D Epoxy plate (clear bottom)                    | PolyAN GmbH (DE) # LW 160418                      |
| Corning standard, not treated (black bottom)     | Corning Incorporated (MA, USA) # 3915             |
| Corning standard, not treated (clear bottom)     | Corning Incorporated (MA, USA) # 3631             |
| Corning standard, high-binding (black bottom)    | Corning Incorporated (MA, USA) # 3925             |
| Corning standard, high-binding (clear bottom)    | Corning Incorporated (MA, USA) # 3601             |
| F96 Microwell™, non-treated (black bottom)       | Thermo Fischer Scientific Inc. (MA, USA) #237108  |
| Polysorp (black bottom)                          | Thermo Fischer Scientific Inc. (MA, USA) #437112  |
| Maxisorp (black bottom)                          | Thermo Fischer Scientific Inc. (MA, USA) #437111  |
| Optical-bottom plate, non-treated (clear bottom) | Thermo Fischer Scientific Inc. (MA, USA) #265301  |
| Microfluor 1, medium binding (black bottom)      | Thermo Fischer Scientific Inc. (MA, USA) #7605    |
| Microfluor 2, high binding (black bottom)        | Thermo Fischer Scientific Inc. (MA, USA) #7805    |
| Universal binding (black bottom)                 | Thermo Fischer Scientific Inc. (MA, USA) #9502867 |

### Spotting Buffers

|                        |                                |
|------------------------|--------------------------------|
| 5% Glycerol in PBS     |                                |
| 50 mM Trehalose in PBS |                                |
| sciSPOT D1             | Scienion AG (DE) # CBP-5431-25 |
| sciSPOT D11            | Scienion AG (DE) # CBP-5435-25 |
| sciSPOT D4             | Scienion AG (DE) # CBP-5442-25 |
| Carbonate buffer       | 50 mM Sodium Carbonate, pH 9.6 |

### Blocking Buffers

|                                          |                                                                  |
|------------------------------------------|------------------------------------------------------------------|
| TTN buffer                               | 50 mM Tris, 1% Tween20®, 0.3 M NaCl, pH 7.5                      |
| 1% Goat serum in PBS                     | Goat serum: Sigma Aldrich (MO, USA) # S26-LITER                  |
| 1% BSA in PBS                            | BSA: Sigma-Aldrich (MO, USA) #7906                               |
| 1x Casein Blocking Buffer                | Sigma-Aldrich (MO, USA) # B6429                                  |
| Ethanolamine                             | 50 mM Ethanolamine, 0.1% SDS, 100 mM Tris, pH 9.0                |
| Ethanolamine / 1x Casein Blocking Buffer | 5x Ethanolamine concentrate diluted in 1x Casein Blocking Buffer |
| 2% Tween20® in PBS                       |                                                                  |
| sciBLOCK protein D1                      | Scienion AG (DE) # CBP-5433-500                                  |

### Incubation and washing buffers

|                                                  |                                 |
|--------------------------------------------------|---------------------------------|
| 0.2 % Tween20® in PBS                            |                                 |
| 0.5% BSA + 0.1% Tween20® in PBS                  |                                 |
| ½x Casein Blocking Buffer + 0.1% Tween20® in PBS |                                 |
| sciWASH protein D1                               | Scienion AG (DE) # CBP-5432-500 |
| sciBIND protein D1                               | Scienion AG (DE) # CBP-5434-1.6 |
